# Supplementary material
Source: HighWire-hosted journal article supplement (https://bmjopen.bmj.com/content/13/9/e072617)
Supplement: inline-supplementary-material-1 [file inline-supplementary-material-1.pdf]

## Appendix A: Search String Syntax

### Ageline (EBSCO)

*Note: Syntax related to older adults is not included in this search string because Ageline exclusively hosts information for adults over aged 50*

((TI "community-based navigation\*" OR AB "community-based navigation\*") OR (TI "clinical link" OR AB "clinical link") OR (TI "clinical-community linkage\*" OR AB "clinical-community linkage\*") OR (TI "community link\*" OR AB "community link\*") OR (TI community-link\* OR AB community-link\*) OR (TI liaison\* OR AB liaison\*) OR (TI "linkage model\*" OR AB "linkage model\*") OR (TI "patient navig\*" OR AB "patient navig\*") OR (TI "system navig\*" OR AB "system navig\*") OR (TI Community-to-Clinic OR AB Community-to-Clinic) OR (MH "Patient Navigation+") OR (TI "Community Health Worker\*" OR AB "Community Health Worker\*") OR (TI navigator\* OR AB navigator\*) OR (TI "health broker\*" OR AB "health broker\*") OR (TI "community navig\*" OR AB "community navig\*") OR (TI "linkage to care" OR AB "linkage to care") OR (MH "Community Health Workers+") OR (MH "Community-Institutional Relations+"))

### APHA Conference Proceedings (2018-2022)(55-59)

("older adult\*" OR "geriat\*" OR "older person\*" OR "senior\*" OR "elder\*" OR "aging" OR "older people\*" OR "older population\*" OR "older patient\*" OR "older women" OR "older men" OR "medicare" OR "Aged" OR "Aged, 80 and over" OR "Frail Elderly" OR "Health Services for the Aged") + ("community-based navigation\*" OR "clinical link" OR "clinical-community linkage\*" OR "community link\*" OR "community-link\*" OR "liaison\*" OR "linkage model\*" OR "patient navig\*" OR "system navig\*" OR "Community-to-Clinic" OR "Patient Navigation" [MeSH] OR "Community Health Worker\*" OR "navigator\*" OR "health broker\*" OR "community navig\*" OR "linkage to care")

### Google ([www.google.com](http://www.google.com))

- community-clinical linkages for older adults elderly seniors
- community clinic referral health program elderly older adults seniors
- community clinic link health program elderly older adults seniors

### CINAHL (EBSCO)

((TI "older adult\*" OR AB "older adult\*") OR (TI geriat\* OR AB geriat\*) OR (TI "older person\*" OR AB "older person\*") OR (TI senior\* OR AB senior\*) OR (TI elder\* OR AB elder\*) OR (TI aging OR AB aging) OR (TI "older people\*" OR AB "older people\*") OR (TI "older population\*" OR AB "older population\*") OR (TI "older patient\*" OR AB "older patient\*") OR (TI "older women" OR AB "older women") OR (TI "older men" OR AB "older men") OR (TI medicare OR AB medicare) OR (MH medicare+) OR (MH Aged+) OR (MH "Aged, 80 and over+") OR (MH "Frail Elderly+") OR (MH Aging+) OR (MH "Health Services for the Aged+") OR (TI Aged OR AB Aged) OR (TI "Aged, 80 and over" OR AB "Aged, 80 and over") OR (TI "Frail Elderly" OR AB "Frail Elderly") OR (TI "Health Services for the Aged" OR AB "Health Services for the Aged") AND ((TI "community-based navigation\*" OR AB "community-based navigation\*") OR (TI "clinical link" OR AB "clinical link") OR (TI "clinical-community linkage\*" OR AB "clinical-community linkage\*") OR (TI "community link\*" OR AB "community link\*") OR (TI community-link\* OR AB community-link\*) OR (TI liaison\* OR AB liaison\*) OR (TI "linkage model\*" OR AB "linkage model\*") OR (TI "patient navig\*" OR AB "patient navig\*") OR (TI "system navig\*" OR AB "system navig\*") OR (TI Community-to-Clinic OR AB Community-to-Clinic) OR (MH "Patient Navigation+") OR (TI "Community Health Worker\*" OR AB "Community Health Worker\*") OR (TI navigator\* OR AB navigator\*) OR (TI "health broker\*" OR AB "health broker\*") OR (TI "community navig\*" OR AB "community navig\*") OR (TI "linkage to care" OR AB "linkage to care") OR (MH "Community Health

Workers+") OR (MH "Community-Institutional Relations+"))

### **MEDLINE (PubMed)**

("older adult\*" [title/abstract] OR "geriat\*" [title/abstract] OR "older person\*" [title/abstract] OR "senior\*" [title/abstract] OR "elder\*" [title/abstract] OR "aging" [title/abstract] OR "older people\*" [title/abstract] OR "older population\*" [title/abstract] OR "older patient\*" [title/abstract] OR "older women" [title/abstract] OR "older men" [title/abstract] OR "medicare" [title/abstract] OR "medicare" [MeSH] OR "Aged" [MeSH] OR "Aged, 80 and over" [MeSH] OR "Frail Elderly" [MeSH] OR "Aging" [MeSH] OR "Health Services for the Aged" [MeSH] OR "Aged" [title/abstract] OR "Aged, 80 and over" [title/abstract] OR "Frail Elderly" [title/abstract] OR "Health Services for the Aged" [title/abstract] AND ("community-based navigation\*" [title/abstract] OR "clinical link" [title/abstract] OR "clinical-community linkage\*" [title/abstract] OR "community link\*" [title/abstract] OR "community-link\*" [title/abstract] OR "liaison\*" [title/abstract] OR "linkage model\*" [title/abstract] OR "patient navig\*" [title/abstract] OR "system navig\*" [title/abstract] OR "Community-to-Clinic" [title/abstract] OR "Patient Navigation" [MeSH] OR "Community Health Worker\*" [title/abstract] OR "navigator\*" [title/abstract] OR "health broker\*" [title/abstract] OR "community navig\*" [title/abstract] OR "linkage to care" [title/abstract] OR "Community Health Workers" [MeSH])

### **Scopus (Elsevier)**

**NOTE – Due to Scopus export limitations (max 2000 citations/export), the search is divided into two: one for years 2015-2022 and a second search for 2014 and all years prior**

#### Scopus (Restrict to 2015-2022)

( TITLE-ABS-KEY ( "older adult\*" ) OR TITLE-ABS-KEY ( "geriatric\*" ) OR TITLE-ABS-KEY ( "older persons" ) OR TITLE-ABS-KEY ( "senior\*" ) OR TITLE-ABS-KEY ( "elder\*" ) OR TITLE-ABS-KEY ( "aging" ) OR TITLE-ABS-KEY ( "older people" ) OR TITLE-ABS-KEY ( "older peoples" ) OR TITLE-ABS-KEY ( "older population\*" ) OR TITLE-ABS-KEY ( "older populations" ) OR TITLE-ABS-KEY ( "older patient\*" ) OR TITLE-ABS-KEY ( "older women" ) OR TITLE-ABS-KEY ( "older men" ) OR TITLE-ABS-KEY ( "medicare" ) OR TITLE-ABS-KEY ( "Frail\* Eld\*" ) OR TITLE-ABS-KEY ( "Frail\* Old\*" ) ) AND ( TITLE-ABS-KEY ( "community-based navigation\*" ) OR TITLE-ABS-KEY ( "clinical link" ) OR TITLE-ABS-KEY ( "clinical-community linkage\*" ) OR TITLE-ABS-KEY ( "community link\*" ) OR TITLE-ABS-KEY ( "community-link\*" ) OR TITLE-ABS-KEY ( "liaison\*" ) OR TITLE-ABS-KEY ( "linkage model\*" ) OR TITLE-ABS-KEY ( "patient navig\*" ) OR TITLE-ABS-KEY ( "system navig\*" ) OR TITLE-ABS-KEY ( "Community-to-Clinic" ) OR TITLE-ABS-KEY ( "Community Health Worker\*" ) OR TITLE-ABS-KEY ( "navigator\*" ) OR TITLE-ABS-KEY ( "health broker\*" ) OR TITLE-ABS-KEY ( "community navig\*" ) OR TITLE-ABS-KEY ( "linkage to care" ) ) AND ( LIMIT-TO ( PUBYEAR , 2022 ) OR LIMIT-TO ( PUBYEAR , 2021 ) OR LIMIT-TO ( PUBYEAR , 2020 ) OR LIMIT-TO ( PUBYEAR , 2019 ) OR LIMIT-TO ( PUBYEAR , 2018 ) OR LIMIT-TO ( PUBYEAR , 2017 ) OR LIMIT-TO ( PUBYEAR , 2016 ) OR LIMIT-TO ( PUBYEAR , 2015 ) )

#### Scopus (Exclude 2015-2022; include all prior years)

( TITLE-ABS-KEY ( "older adult\*" ) OR TITLE-ABS-KEY ( "geriatric\*" ) OR TITLE-ABS-KEY ( "older persons" ) OR TITLE-ABS-KEY ( "senior\*" ) OR TITLE-ABS-KEY ( "elder\*" ) OR TITLE-ABS-KEY ( "aging" ) OR TITLE-ABS-KEY ( "older people" ) OR TITLE-ABS-KEY ( "older peoples" ) OR TITLE-ABS-KEY ( "older population\*" ) OR TITLE-ABS-KEY ( "older populations" ) OR TITLE-ABS-KEY ( "older patient\*" ) OR TITLE-ABS-KEY ( "older women" ) OR TITLE-ABS-KEY ( "older men" ) OR TITLE-ABS-KEY ( "medicare" ) OR TITLE-ABS-KEY ( "Frail\* Eld\*" ) OR TITLE-ABS-KEY ( "Frail\* Old\*" ) ) AND ( TITLE-ABS-KEY ( "community-based navigation\*" ) OR TITLE-ABS-KEY ( "clinical link" ) OR TITLE-ABS-KEY ( "clinical-community linkage\*" ) OR TITLE-ABS-KEY ( "community link\*" ) OR TITLE-ABS-KEY ( "community-link\*" ) OR TITLE-

ABS-KEY ( "liaison\*" ) OR TITLE-ABS-KEY ( "linkage model\*" ) OR TITLE-ABS-KEY ( "patient navig\*" ) OR TITLE-ABS-KEY ( "system navig\*" ) OR TITLE-ABS-KEY ( "Community-to-Clinic" ) OR TITLE-ABS-KEY ( "Community Health Worker\*" ) OR TITLE-ABS-KEY ( "navigator\*" ) OR TITLE-ABS-KEY ( "health broker\*" ) OR TITLE-ABS-KEY ( "community navig\*" ) OR TITLE-ABS-KEY ( "linkage to care" ) ) AND ( EXCLUDE ( PUBYEAR , 2022 ) OR EXCLUDE ( PUBYEAR , 2021 ) OR EXCLUDE ( PUBYEAR , 2020 ) OR EXCLUDE ( PUBYEAR , 2019 ) OR EXCLUDE ( PUBYEAR , 2018 ) OR EXCLUDE ( PUBYEAR , 2017 ) OR EXCLUDE ( PUBYEAR , 2016 ) OR EXCLUDE ( PUBYEAR , 2015 ) )

### **SIREN Evidence & Resource Library Search String**

The SIREN search engine could not complete a search using complex syntax. Instead, this review will follow the following process to identify resources related to older adults:

- Visit <https://sirenetwork.ucsf.edu/tools/evidence-library>
- Select: Search Resource > Population > *select* Elderly > *click* Submit Search

### **Social Services Abstracts (ProQuest)**

(TI,AB("older adult\*") OR TI,AB(geriat\*) OR TI,AB("older person\*") OR TI,AB(senior\*) OR TI,AB(elder\*) OR TI,AB(aging) OR TI,AB("older people\*") OR TI,AB("older population\*") OR TI,AB("older patient\*") OR TI,AB("older women") OR TI,AB("older men") OR TI,AB(medicare) OR MESH.EXACT(medicare) OR MESH.EXACT(Aged) OR MESH.EXACT("Aged, 80 and over") OR MESH.EXACT("Frail Elderly") OR MESH.EXACT(Aging) OR MESH.EXACT("Health Services for the Aged") OR TI,AB(Aged) OR TI,AB("Aged, 80 and over") OR TI,AB("Frail Elderly") OR TI,AB("Health Services for the Aged")) AND (TI,AB("community-based navigation\*") OR TI,AB("clinical link") OR TI,AB("clinical-community linkage\*") OR TI,AB("community link\*") OR TI,AB("community-link\*") OR TI,AB(liaison\*) OR TI,AB("linkage model\*") OR TI,AB("patient navig\*") OR TI,AB("system navig\*") OR TI,AB(Community-to-Clinic) OR MESH.EXACT("Patient Navigation") OR TI,AB("Community Health Worker\*") OR TI,AB(navigator\*) OR TI,AB("health broker\*") OR TI,AB("community navig\*") OR TI,AB("linkage to care") OR MESH.EXACT("Community Health Workers"))

### **Web of Science Core Collection (Clarivate)**

TS=(("older adult\*" OR geriat\* OR "older person\*" OR senior\* OR elder\* OR aging OR "older people\*" OR "older population\*" OR "older patient\*" OR "older women" OR "older men" OR medicare OR medicare OR Aged OR "Aged, 80 and over" OR "Frail Elderly" OR Aging OR "Health Services for the Aged" OR Aged OR "Aged, 80 and over" OR "Frail Elderly" OR "Health Services for the Aged") AND ("community-based navigation\*" OR "clinical link" OR "clinical-community linkage\*" OR "community link\*" OR community-link\* OR liaison\* OR "linkage model\*" OR "patient navig\*" OR "system navig\*" OR Community-to-Clinic OR "Patient Navigation" OR "Community Health Worker\*" OR navigator\* OR "health broker\*" OR "community navig\*" OR "linkage to care" OR "Community Health Workers"))
