# Supplementary material
Source: HighWire-hosted journal article supplement (https://bmjopen.bmj.com/content/13/9/e072617)
Supplement: inline-supplementary-material-2 [file inline-supplementary-material-2.pdf]

**Appendix B** Proposed data extraction tool and corresponding proposed data reporting format for publication, operationalizing healthcare access at the system and individual levels using Levesque and colleagues' Conceptual Framework of Access to Health

| A          | B               | C                                                               | D                                      | E                                                            | F                                                                                                                                                                              | G                                                                         | H                                                                                                                                                                                                                         | I                                                                                                                                                                                                                                                      |
|------------|-----------------|-----------------------------------------------------------------|----------------------------------------|--------------------------------------------------------------|--------------------------------------------------------------------------------------------------------------------------------------------------------------------------------|---------------------------------------------------------------------------|---------------------------------------------------------------------------------------------------------------------------------------------------------------------------------------------------------------------------|--------------------------------------------------------------------------------------------------------------------------------------------------------------------------------------------------------------------------------------------------------|
| Question # | Branching logic | Conceptual Framework of Access to Health (Levesque et al. 2013) |                                        |                                                              | Extraction Form (REVIEWER USE ONLY)                                                                                                                                            |                                                                           |                                                                                                                                                                                                                           | Proposed reporting in Scoping Review (AGGREGATED REPORTING FOR PUBLICATION)                                                                                                                                                                            |
|            |                 | Ecological Level                                                | Domain of Access (Levesque et al 2013) | Relevant Levesque example (as per Levesque et al., Figure 2) | Extraction item                                                                                                                                                                | Question Type                                                             | Available Answers                                                                                                                                                                                                         | AGGREGATED AND REPORTED FOR PUBLICATION                                                                                                                                                                                                                |
| 1          |                 | n/a                                                             |                                        |                                                              | Author                                                                                                                                                                         | Free text                                                                 | [Free text response]                                                                                                                                                                                                      | <i>cited in bibliography - not reported in table</i>                                                                                                                                                                                                   |
| 2          |                 |                                                                 |                                        |                                                              | Year of publication                                                                                                                                                            | Year (numerical)                                                          | [Free text response]                                                                                                                                                                                                      | <i>cited in bibliography - not reported in table</i>                                                                                                                                                                                                   |
| 3          |                 |                                                                 |                                        |                                                              | Country program delivered in                                                                                                                                                   | Free text                                                                 | [Free text response]                                                                                                                                                                                                      | <i>Categorized, reported as % - categories to be established after data collection</i>                                                                                                                                                                 |
| 4          |                 |                                                                 |                                        |                                                              | Publication type                                                                                                                                                               | Select one                                                                | Peer-reviewed journal<br>Grey literature<br>Other                                                                                                                                                                         | % Peer-reviewed journal<br>% Grey literature<br>% Other                                                                                                                                                                                                |
| 5          |                 |                                                                 |                                        |                                                              | Description or definition of "older adult"                                                                                                                                     | Free text                                                                 | [Free text: Enter qualitative or quantitative description as reported]                                                                                                                                                    | <i>Categorized, reported as % - categories to be established after data collection</i>                                                                                                                                                                 |
| 6          |                 |                                                                 |                                        |                                                              | Demographic characteristics of target population: Gender                                                                                                                       | No restriction/not reported<br>Male only<br>Female only<br>Trans/GNC only | [Free text response]                                                                                                                                                                                                      | % No restriction/not reported<br>% Male only<br>% Female only<br>% Trans/GNC only"                                                                                                                                                                     |
| 7          |                 |                                                                 |                                        |                                                              | Demographic characteristics of target population: Race                                                                                                                         | Select all that apply                                                     | No restriction/not reported<br>Black<br>White<br>AIAN<br>NHOPi<br>Asian                                                                                                                                                   | % No restriction/not reported<br>% Black<br>% White<br>% AIAN<br>% NHOPi<br>% Asian                                                                                                                                                                    |
| 8          |                 |                                                                 |                                        |                                                              | Demographic characteristics of target population: Ethnicity                                                                                                                    | Select one                                                                | No restriction/not reported<br>Hispanic<br>Non-Hispanic                                                                                                                                                                   | % No restriction/not reported<br>% Hispanic<br>% Non-Hispanic                                                                                                                                                                                          |
| 9          |                 |                                                                 |                                        |                                                              | Primary term used to describe the program in title/abstract                                                                                                                    | Select all that apply                                                     | Clinical link/linkage<br>Community-to-clinic link/linkage<br>Community-clinic link/linkage<br>Community-based navigation<br>Health broker<br>Linkage program<br>Liasion program<br>Linkage to care<br>Other (FILL IN ___) | % Clinical link/linkage<br>% Community-to-clinic link/linkage<br>% Community-clinic link/linkage<br>% Community-based navigation<br>% Health broker<br>% Linkage program<br>% Liasion program<br>% Linkage to care<br>% Other (REPORT ENTRIES IN LIST) |
| 10         | --              | System                                                          | Approachability                        | Outreach                                                     | Is the program publicized?                                                                                                                                                     | Select one                                                                | Yes<br>No                                                                                                                                                                                                                 | % Yes<br>% No                                                                                                                                                                                                                                          |
| 11         | --              | System                                                          | Approachability                        | Outreach                                                     | Does the program description explicitly state if targeted outreach to vulnerable, high-risk groups (e.g., socially isolated older adults) is a component of program publicity? | Select one                                                                | Yes<br>No                                                                                                                                                                                                                 | % Yes<br>% No                                                                                                                                                                                                                                          |

| A          | B               | C                                                               |                                        |                                                              | D                                                                                                                                                                                                                     | E                     | F                                                                                                                                                                                                                                                                                                                                                                                                |  |  | G                                                                                                                                                                                                                                                                                                                                                                                                              | H | I                                                                           |
|------------|-----------------|-----------------------------------------------------------------|----------------------------------------|--------------------------------------------------------------|-----------------------------------------------------------------------------------------------------------------------------------------------------------------------------------------------------------------------|-----------------------|--------------------------------------------------------------------------------------------------------------------------------------------------------------------------------------------------------------------------------------------------------------------------------------------------------------------------------------------------------------------------------------------------|--|--|----------------------------------------------------------------------------------------------------------------------------------------------------------------------------------------------------------------------------------------------------------------------------------------------------------------------------------------------------------------------------------------------------------------|---|-----------------------------------------------------------------------------|
| Question # | Branching logic | Conceptual Framework of Access to Health (Levesque et al. 2013) |                                        |                                                              | Extraction Form (REVIEWER USE ONLY)                                                                                                                                                                                   |                       |                                                                                                                                                                                                                                                                                                                                                                                                  |  |  |                                                                                                                                                                                                                                                                                                                                                                                                                |   | Proposed reporting in Scoping Review (AGGREGATED REPORTING FOR PUBLICATION) |
|            |                 | Ecological Level                                                | Domain of Access (Levesque et al 2013) | Relevant Levesque example (as per Levesque et al., Figure 2) | Extraction item                                                                                                                                                                                                       | Question Type         | Available Answers                                                                                                                                                                                                                                                                                                                                                                                |  |  | AGGREGATED AND REPORTED FOR PUBLICATION                                                                                                                                                                                                                                                                                                                                                                        |   |                                                                             |
| 12         | If Q10=yes      | System                                                          | Approachability                        | Outreach                                                     | How is the program publicized to community members? (Select all that apply: Printed pamphlets; Printed poster (e.g., on bulletin boards); Social media; Email; Peer referral; Professional referral; Other (fill in)) | Select all that apply | Not reported<br>Printed pamphlets<br>Printed poster (e.g., on bulletin boards)<br>Social media<br>Email<br>Peer referral<br>Professional referral<br>Other (Fill in: _____)                                                                                                                                                                                                                      |  |  | % Not reported<br>% Printed pamphlets<br>% Printed poster (e.g., on bulletin boards)<br>% Social media<br>% Email<br>% Peer referral<br>% Professional referral<br>% Other (REPORT ENTRIES IN LIST)                                                                                                                                                                                                            |   |                                                                             |
| 13         | If Q10=yes      | System                                                          | Approachability                        | Outreach                                                     | In which community setting(s) are programs <u>publicized</u> in?                                                                                                                                                      | Select all that apply | Not reported<br>Place of employment<br>Prison or jail<br>Faith-based organization<br>Barbershops<br>Community centers (e.g., senior centers)<br>Volunteer organizations (e.g., American Heart Association)<br>Nonprofit organizations (e.g., YMCAs)<br>Clinical setting (hospital or community clinic/office)<br>Home visit<br>Other (Fill in: _____)<br>*** <i>(list adapted from CDC 2016)</i> |  |  | % Not reported<br>% Place of employment<br>% Prison or jail<br>% Faith-based organization<br>% Barbershops<br>% Community centers (e.g., senior centers)<br>% Volunteer organizations (e.g., American Heart Association)<br>% Nonprofit organizations (e.g., YMCAs)<br>% Clinical setting (hospital or community clinic/office)<br>% Other (REPORT ENTRIES IN LIST)<br>*** <i>(list adapted from CDC 2016)</i> |   |                                                                             |
| 14         | --              | System                                                          | Acceptability                          | Professional values, norms, culture, gender                  | Does the program description explicitly designed to meet the unique needs of its target population(s)?                                                                                                                | Select one            | Yes<br>No                                                                                                                                                                                                                                                                                                                                                                                        |  |  | % Yes<br>% No                                                                                                                                                                                                                                                                                                                                                                                                  |   |                                                                             |
| 15         | --              | System                                                          | Acceptability                          | Professional values, norms, culture, gender                  | Does the program description explicitly state how the program meets the unique needs of different cultural, socioeconomically disadvantaged, or vulnerable groups within the target population(s)?                    | Select one            | Yes<br>No                                                                                                                                                                                                                                                                                                                                                                                        |  |  | % Yes<br>% No                                                                                                                                                                                                                                                                                                                                                                                                  |   |                                                                             |
| 16         | --              | System                                                          | Availability and accommodation         | Appointments mechanisms                                      | Is an appointment mechanism explicitly a component of the program?                                                                                                                                                    | Select one            | Not reported<br>Yes<br>No                                                                                                                                                                                                                                                                                                                                                                        |  |  | % Not reported<br>% Yes<br>% No                                                                                                                                                                                                                                                                                                                                                                                |   |                                                                             |
| 17         | --              | System                                                          | Availability and accommodation         | Accommodation                                                | Is the program explicitly designed to include people with disabilities?                                                                                                                                               | Select all that apply | Yes - physical/mobility<br>Yes - intellectual and/or developmental<br>Yes - hard of hearing or deaf<br>Yes - visually impaired or blind<br>Yes - other disability (Fill in _____)<br>No<br>Not reported                                                                                                                                                                                          |  |  | % Not reported<br>% Yes - Community-based participatory research methods<br>% Yes - Co-creation methods<br>% Yes - User-centered design<br>% Yes - Community advisory board<br>% Yes - Other method (REPORT ENTRIES IN LIST)<br>% No                                                                                                                                                                           |   |                                                                             |

| A          | B               | C                                                               | D                                      | E                                                            | F                                                                                                                              | G                     | H                                                                                                                                                                                                                      | I                                                                                                                                                                                                                                    |
|------------|-----------------|-----------------------------------------------------------------|----------------------------------------|--------------------------------------------------------------|--------------------------------------------------------------------------------------------------------------------------------|-----------------------|------------------------------------------------------------------------------------------------------------------------------------------------------------------------------------------------------------------------|--------------------------------------------------------------------------------------------------------------------------------------------------------------------------------------------------------------------------------------|
| Question # | Branching logic | Conceptual Framework of Access to Health (Levesque et al. 2013) |                                        |                                                              | Extraction Form (REVIEWER USE ONLY)                                                                                            |                       |                                                                                                                                                                                                                        | Proposed reporting in Scoping Review (AGGREGATED REPORTING FOR PUBLICATION)                                                                                                                                                          |
|            |                 | Ecological Level                                                | Domain of Access (Levesque et al 2013) | Relevant Levesque example (as per Levesque et al., Figure 2) | Extraction item                                                                                                                | Question Type         | Available Answers                                                                                                                                                                                                      | AGGREGATED AND REPORTED FOR PUBLICATION                                                                                                                                                                                              |
| 18         | --              | System                                                          | Affordability                          | What are the direct and indirect costs of the intervention?  | What are the direct costs of the program reported?                                                                             | Select one            | Not reported<br>Direct costs = \$0<br>Direct costs > \$0 (ENTER REPORTED \$: ____)                                                                                                                                     | % Not reported<br>% Direct costs = \$0<br>% Direct costs > \$0<br>REPORT Mean, SD, Range: Direct costs > \$0                                                                                                                         |
| 19         | --              | System                                                          | Affordability                          | What are the direct and indirect costs of the intervention?  | What are the indirect costs of the program reported?                                                                           | Select one            | Not reported<br>Indirect costs = \$0<br>Indirect costs > \$0 (ENTER REPORTED \$: ____)                                                                                                                                 | % Not reported % Indirect costs = \$0<br>% Indirect costs > \$0<br>REPORT Mean, SD, Range: Indirect costs > \$0                                                                                                                      |
| 20         | --              | System                                                          | Appropriateness                        | Adequacy                                                     | Which population(s) is the program intended for?                                                                               | Free text             | [Free text response]                                                                                                                                                                                                   | <i>Categorized, reported as % - categories to be established after data collection</i>                                                                                                                                               |
| 21         | --              | System                                                          | Appropriateness                        | Adequacy                                                     | What diagnose(es) (e.g., diabetes, complex needs) or health-related issues (e.g., social determinants of health) are targeted? | Free text             | [Free text response]                                                                                                                                                                                                   | <i>Categorized, reported as % - categories to be established after data collection</i>                                                                                                                                               |
| 22         | --              | System                                                          | Appropriateness                        | Adequacy                                                     | What programs/resources are provided?                                                                                          | Free text             | [Free text response]                                                                                                                                                                                                   | <i>Categorized, reported as % - categories to be established after data collection</i>                                                                                                                                               |
| Q23 = Q29  | --              | System                                                          | Appropriateness                        | Adequacy                                                     | Were members of the target population involved in developing the program?                                                      | Select all that apply | Not reported<br>Yes - Community-based participatory research methods<br>Yes - Co-creation methods<br>Yes - User-centered design<br>Yes - Community advisory board<br>Yes - Other method (REPORT ENTRIES IN LIST)<br>No | % Not reported<br>% Yes - Community-based participatory research methods<br>% Yes - Co-creation methods<br>% Yes - User-centered design<br>% Yes - Community advisory board<br>% Yes - Other method (REPORT ENTRIES IN LIST)<br>% No |
| 23         | --              | System                                                          | Appropriateness                        | Quality                                                      | Is program quality evaluated?                                                                                                  | Select one            | Not reported<br>Yes<br>No                                                                                                                                                                                              | % Not reported<br>% Yes<br>% No                                                                                                                                                                                                      |
| 24         | If 23 = Yes     | System                                                          | Appropriateness                        | Quality                                                      | How is program quality evaluated?                                                                                              | Free text             | [Free text response]                                                                                                                                                                                                   | <i>Categorized, reported as % - categories to be established after data collection</i>                                                                                                                                               |
| 25         | --              | System                                                          | Appropriateness                        | Coordination and continuity                                  | Who is the healthcare sector representative(s)?                                                                                | Select all that apply | Not reported<br>Health professional (MD, NP, RN)<br>MSW<br>Other allied health professional (e.g., OT, SLP, PT)<br>Caregiver (formal or informal)<br>Student<br>Research staff                                         | % Not reported<br>% Health professional (MD, NP, RN)<br>% MSW<br>% Other allied health professional (e.g., OT, SLP, PT)<br>% Caregiver (formal or informal)<br>% Student<br>% Research faculty                                       |

| A          | B               | C                                                               | D                                      | E                                                            | F                                                                                                                                                            | G                     | H                                                                                                                                                                                                                                                                               | I                                                                                                                                                                                                                                |
|------------|-----------------|-----------------------------------------------------------------|----------------------------------------|--------------------------------------------------------------|--------------------------------------------------------------------------------------------------------------------------------------------------------------|-----------------------|---------------------------------------------------------------------------------------------------------------------------------------------------------------------------------------------------------------------------------------------------------------------------------|----------------------------------------------------------------------------------------------------------------------------------------------------------------------------------------------------------------------------------|
| Question # | Branching logic | Conceptual Framework of Access to Health (Levesque et al. 2013) |                                        |                                                              | Extraction Form (REVIEWER USE ONLY)                                                                                                                          |                       |                                                                                                                                                                                                                                                                                 | Proposed reporting in Scoping Review (AGGREGATED REPORTING FOR PUBLICATION)                                                                                                                                                      |
|            |                 | Ecological Level                                                | Domain of Access (Levesque et al 2013) | Relevant Levesque example (as per Levesque et al., Figure 2) | Extraction item                                                                                                                                              | Question Type         | Available Answers                                                                                                                                                                                                                                                               | AGGREGATED AND REPORTED FOR PUBLICATION                                                                                                                                                                                          |
| 26         | --              | System                                                          | Appropriateness                        | Coordination and continuity                                  | Who coordinates between the healthcare and community sectors?                                                                                                | Select all that apply | Not reported<br>Health professional (MD, NP, RN)<br>MSW<br>Other allied health professional (e.g., OT, SLP, PT)<br>Caregiver (formal or informal)<br>Student<br>Research staff<br>Other (fill in _____)<br><i>*adapted from Carter et al 2018 DOI 10.1186/s12913-018-2889-0</i> | % Not reported<br>% Health professional (MD, NP, RN)<br>% MSW<br>% Other allied health professional (e.g., OT, SLP, PT)<br>% Caregiver (formal or informal)<br>% Student<br>% Research staff<br>% Other (REPORT ENTRIES IN LIST) |
| 27         | --              | System                                                          | Appropriateness                        | Coordination and continuity                                  | Does the program description explicitly state that the program aims to promote continuity of care?                                                           | Select one            | Yes<br>No                                                                                                                                                                                                                                                                       | % Yes<br>% No                                                                                                                                                                                                                    |
| 28         | --              | System                                                          | Appropriateness                        | Coordination and continuity                                  | Does the program description directly or indirectly indicated that the program aims to promote patient-centered care or attributes of patient-centered care? | Select one            | Yes<br>No                                                                                                                                                                                                                                                                       | % Yes<br>% No                                                                                                                                                                                                                    |
| Q23 = Q29  | --              | Individual                                                      | Ability to perceive                    | Trust                                                        | Were members of the target population involved in developing the program?                                                                                    | Select all that apply | Not reported<br>Yes - Community-based participatory research methods<br>Yes - Co-creation methods<br>Yes - User-centered design<br>Yes - Community advisory board<br>Yes - Other method (REPORT ENTRIES IN LIST)<br>No                                                          | % Not reported<br>% Yes - Community-based participatory research methods<br>% Yes - Co-creation methods<br>% Yes - User-centered design<br>% Yes - Community advisory board<br>% Yes - Other method<br>% No                      |
| 30         | --              | Individual                                                      | Ability to perceive                    | Health literacy                                              | Is participants' health literacy assessed?                                                                                                                   | Select one            | Not reported<br>Yes<br>No                                                                                                                                                                                                                                                       | % Not reported<br>% Yes<br>% No                                                                                                                                                                                                  |
| 31         | --              | Individual                                                      | Ability to perceive                    | Health beliefs                                               | Are participants' health beliefs assessed?                                                                                                                   | Select one            | Not reported<br>Yes<br>No                                                                                                                                                                                                                                                       | % Not reported<br>% Yes<br>% No                                                                                                                                                                                                  |
| 32         | --              | Individual                                                      | Ability to perceive                    | Trust                                                        | Is a trusted messenger involved in program publicity or delivery?                                                                                            | Select all that apply | Not reported<br>Yes - Faith leader (eg clergy)<br>Yes - Community Health Worker<br>Yes - Caregiver<br>Yes - Non-caregiver other friend or family member<br>Yes - Peer<br>No                                                                                                     | % Not reported<br>% Yes - Faith leader (eg clergy)<br>% Yes - Community Health Worker<br>% Yes - Caregiver<br>% Yes - Non-caregiver other friend or family member<br>% Yes - Peer<br>% No                                        |

| A          | B               | C                                                               |                                        |                                                              | D                                                                                                                                                                                                       | E                                   | F                                                                                                                                                                                                                                                                                                                                                   |  |  | G                                                                                                                                                                                                                                                                                                                                                                   | H | I                                                                           |
|------------|-----------------|-----------------------------------------------------------------|----------------------------------------|--------------------------------------------------------------|---------------------------------------------------------------------------------------------------------------------------------------------------------------------------------------------------------|-------------------------------------|-----------------------------------------------------------------------------------------------------------------------------------------------------------------------------------------------------------------------------------------------------------------------------------------------------------------------------------------------------|--|--|---------------------------------------------------------------------------------------------------------------------------------------------------------------------------------------------------------------------------------------------------------------------------------------------------------------------------------------------------------------------|---|-----------------------------------------------------------------------------|
| Question # | Branching logic | Conceptual Framework of Access to Health (Levesque et al. 2013) |                                        |                                                              |                                                                                                                                                                                                         | Extraction Form (REVIEWER USE ONLY) |                                                                                                                                                                                                                                                                                                                                                     |  |  |                                                                                                                                                                                                                                                                                                                                                                     |   | Proposed reporting in Scoping Review (AGGREGATED REPORTING FOR PUBLICATION) |
|            |                 | Ecological Level                                                | Domain of Access (Levesque et al 2013) | Relevant Levesque example (as per Levesque et al., Figure 2) | Extraction item                                                                                                                                                                                         | Question Type                       | Available Answers                                                                                                                                                                                                                                                                                                                                   |  |  | AGGREGATED AND REPORTED FOR PUBLICATION                                                                                                                                                                                                                                                                                                                             |   |                                                                             |
| 33         | --              | Individual                                                      | Ability to seek                        | Personal and social values, culture, gender, autonomy        | Does the program description explicitly state that it is designed to meet the unique needs of different cultural, socioeconomically disadvantaged, or vulnerable groups within the target               | Select one                          | Yes<br>No                                                                                                                                                                                                                                                                                                                                           |  |  | % Yes<br>% No                                                                                                                                                                                                                                                                                                                                                       |   |                                                                             |
| 34         | If Q33 = Yes    | Individual                                                      | Ability to seek                        | Personal and social values, culture, gender, autonomy        | Does the program description explicitly state how it is designed to meet the unique needs of different cultural, socioeconomically disadvantaged, or vulnerable groups within the target population(s)? | Select one                          | Yes (Fill in: ____)<br>No                                                                                                                                                                                                                                                                                                                           |  |  | % Yes (REPORT ENTRIES IN LIST)<br>% No                                                                                                                                                                                                                                                                                                                              |   |                                                                             |
| 35         | --              | Individual                                                      | Ability to reach                       | Transportation Mobility                                      | In what physical location is the program delivered?                                                                                                                                                     | Select all that apply               | Not reported<br>Place of employment<br>Prison or jail<br>Faith-based organization<br>Barbershops<br>Community centers (e.g., senior centers)<br>Volunteer organizations (e.g., American Heart Association)<br>Nonprofit organizations (e.g., YMCAs)<br>Clinical setting (hospital or community clinic/office)<br>Home visit<br>Other (fill in ____) |  |  | % Not reported<br>% Place of employment<br>% Prison or jail<br>% Faith-based organization<br>% Barbershops<br>% Community centers (e.g., senior centers)<br>% Volunteer organizations (e.g., American Heart Association)<br>% Nonprofit organizations (e.g., YMCAs)<br>% Clinical setting (hospital or community clinic/office)<br>% Other (REPORT ENTRIES IN LIST) |   |                                                                             |
| 36         | --              | Individual                                                      | Ability to reach                       | Transportation Mobility                                      | Does the program description explicitly state how the program ensures the inclusion of participants who have challenges with transportation (e.g., due to mobility or transportation cost)?             | Select one                          | Not reported<br>Yes<br>No<br>Not applicable - no transportation required to participate in program                                                                                                                                                                                                                                                  |  |  | % Not reported<br>% Yes<br>% No<br>% Not applicable - no transportation required to participate in program                                                                                                                                                                                                                                                          |   |                                                                             |
| 37         | --              | Individual                                                      | Ability to reach                       | Social support                                               | Does the program description explicitly state how it engages social support networks or caregivers to facilitate older adults' access to the program?                                                   | Select one                          | Not reported<br>Yes<br>No                                                                                                                                                                                                                                                                                                                           |  |  | % Not reported<br>% Yes<br>% No                                                                                                                                                                                                                                                                                                                                     |   |                                                                             |
| 38         | --              | Individual                                                      | Ability to pay                         | Income Assets<br>Social capital                              | Does the program description explicitly state how the program ensures the inclusion of participants who can't afford its cost?                                                                          | Select one                          | Not reported<br>Yes<br>No<br>No participation cost (not applicable)                                                                                                                                                                                                                                                                                 |  |  | % Not reported<br>% Yes<br>% No<br>% Not applicable - no cost                                                                                                                                                                                                                                                                                                       |   |                                                                             |

| A          | B               | C                                                               | D                                      | E                                                            | F                                                                                                                                                                                         | G             | H                         | I                                                                                      |
|------------|-----------------|-----------------------------------------------------------------|----------------------------------------|--------------------------------------------------------------|-------------------------------------------------------------------------------------------------------------------------------------------------------------------------------------------|---------------|---------------------------|----------------------------------------------------------------------------------------|
| Question # | Branching logic | Conceptual Framework of Access to Health (Levesque et al. 2013) |                                        |                                                              | Extraction Form (REVIEWER USE ONLY)                                                                                                                                                       |               |                           | Proposed reporting in Scoping Review (AGGREGATED REPORTING FOR PUBLICATION)            |
|            |                 | Ecological Level                                                | Domain of Access (Levesque et al 2013) | Relevant Levesque example (as per Levesque et al., Figure 2) | Extraction item                                                                                                                                                                           | Question Type | Available Answers         | AGGREGATED AND REPORTED FOR PUBLICATION                                                |
| 39         | --              | Individual                                                      | Ability to pay                         | Income<br>Assets<br>Social capital                           | Does the program description explicitly state that it is designed to meet the unique needs of different cultural, socioeconomically disadvantaged, or vulnerable older adult populations? | Select one    | Not reported<br>Yes<br>No | % Not reported<br>% Yes<br>% No                                                        |
| 40         | If Q39=YES      | Individual                                                      | Ability to pay                         | Income<br>Assets<br>Social capital                           | How does the program meet the unique needs of different cultural, socioeconomically disadvantaged, or vulnerable older adult populations?                                                 | Free text     | [Free text response]      | <i>Categorized, reported as % - categories to be established after data collection</i> |
| 41         | --              | Individual                                                      | Ability to engage                      | Caregiver support                                            | Is the program explicitly designed to support older adults' caregivers in delivery of the program to the care recipient?                                                                  | Select one    | Not reported<br>Yes<br>No | % Not reported<br>% Yes<br>% No                                                        |
| 42         | --              | Individual                                                      | Ability to engage                      | Empowerment                                                  | Is participants' self-efficacy about managing the relevant health concern assessed?                                                                                                       | Select one    | Not reported<br>Yes<br>No | % Not reported<br>% Yes<br>% No                                                        |
| 43         | --              | Individual                                                      | Ability to engage                      | Information                                                  | Is participants' health literacy about the relevant health concern assessed?                                                                                                              | Select one    | Not reported<br>Yes<br>No | % Not reported<br>% Yes<br>% No                                                        |
